# Supplementary material for: Critical Factors in Human Antizymes that Determine the Differential Binding, Inhibition, and Degradation of Human Ornithine Decarboxylase
Source: PubMed Central journal article supplement (PMC6995573; doi:10.3390/biom9120864), 2019-12-12
Supplement: biomolecules-09-00864-s001.pdf [file biomolecules-09-00864-s001.pdf]

## **Supplementary Data**

### **Critical factors in human antizymes that determine the differential binding, inhibition, and degradation of human ornithine decarboxylase**

Ju-Yi Hsieh, Yen-Chin Liu, I-Ting Cheng, Chu-Ju Lee, Yu-Hsuan Wang, Yi-Shiuan Fang, Yi-Liang Liu, Guang-Yaw Liu, Hui-Chih Hung

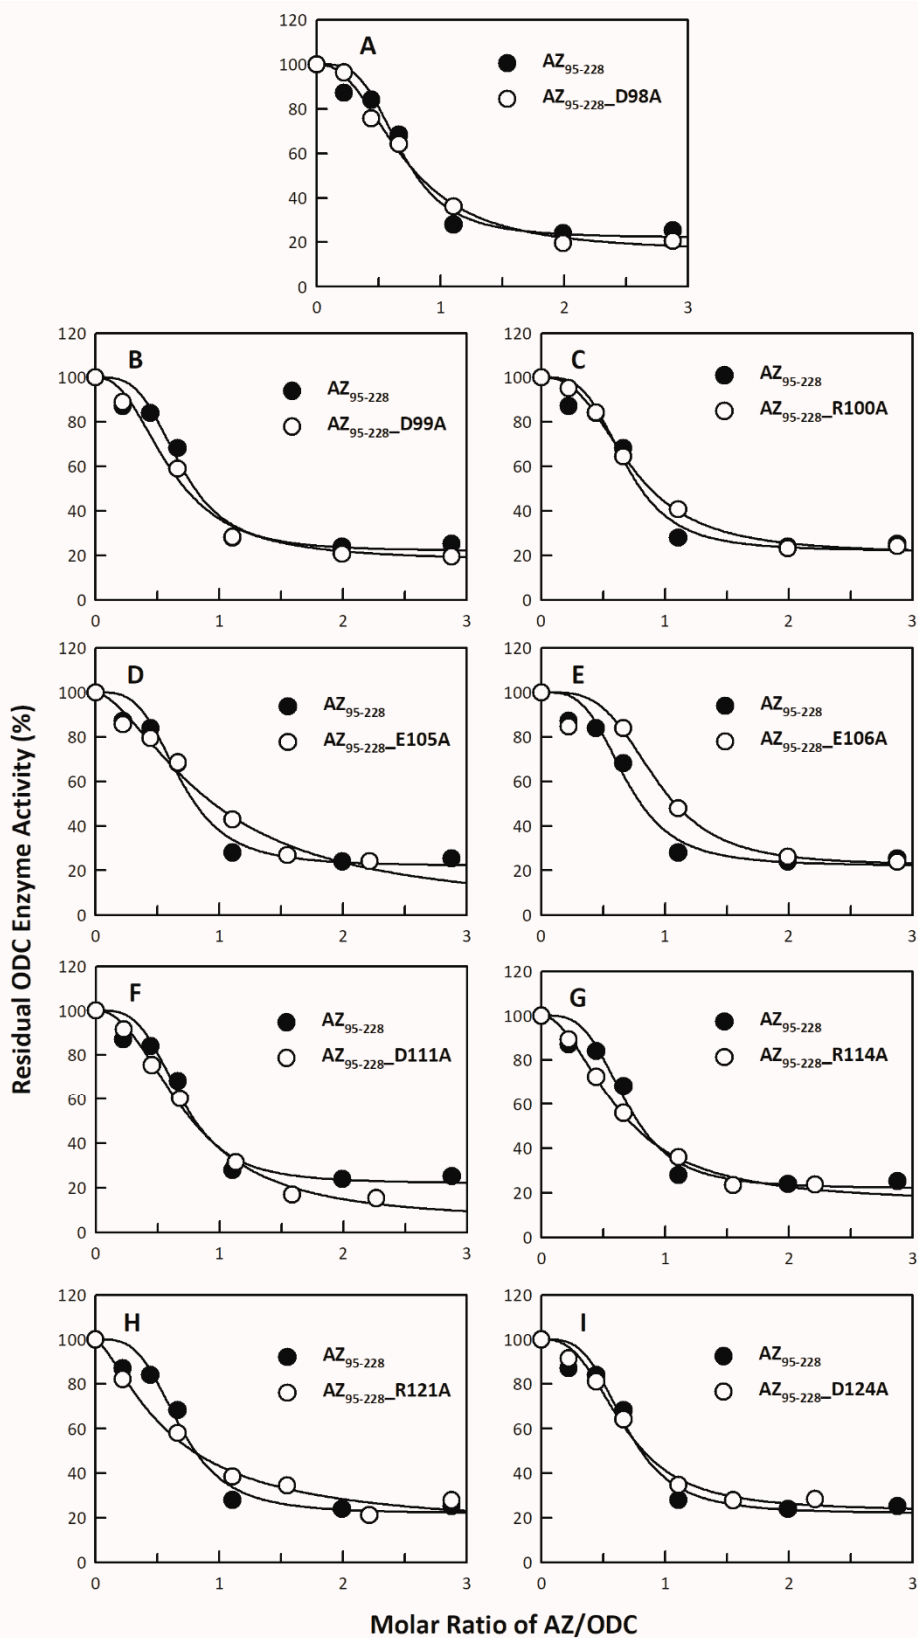

**Figure S1: Inhibition plots of the ODC enzyme with single mutants of AZ<sub>95-228</sub> within the  $\beta$ 1- $\beta$ 3 region and their connecting loops.**

The enzyme activity of ODC was inhibited by various single mutants of AZ<sub>95-228</sub>. The IC<sub>50</sub> value of each single mutant of AZ<sub>95-228</sub> presented in Table S1 was derived by curve-fitting the inhibition plots. The molar ratio refers to AZ<sub>95-228</sub> versus the ODC monomer. (A) AZ<sub>95-228</sub>\_D98A, (B) AZ<sub>95-228</sub>\_D99A, (C) AZ<sub>95-228</sub>\_R100A, (D) AZ<sub>95-228</sub>\_E105A, (E) AZ<sub>95-228</sub>\_E106A, (F) AZ<sub>95-228</sub>\_D111A, (G) AZ<sub>95-228</sub>\_R114A, (H) AZ<sub>95-228</sub>\_R121A and (I) AZ<sub>95-228</sub>\_D124A.

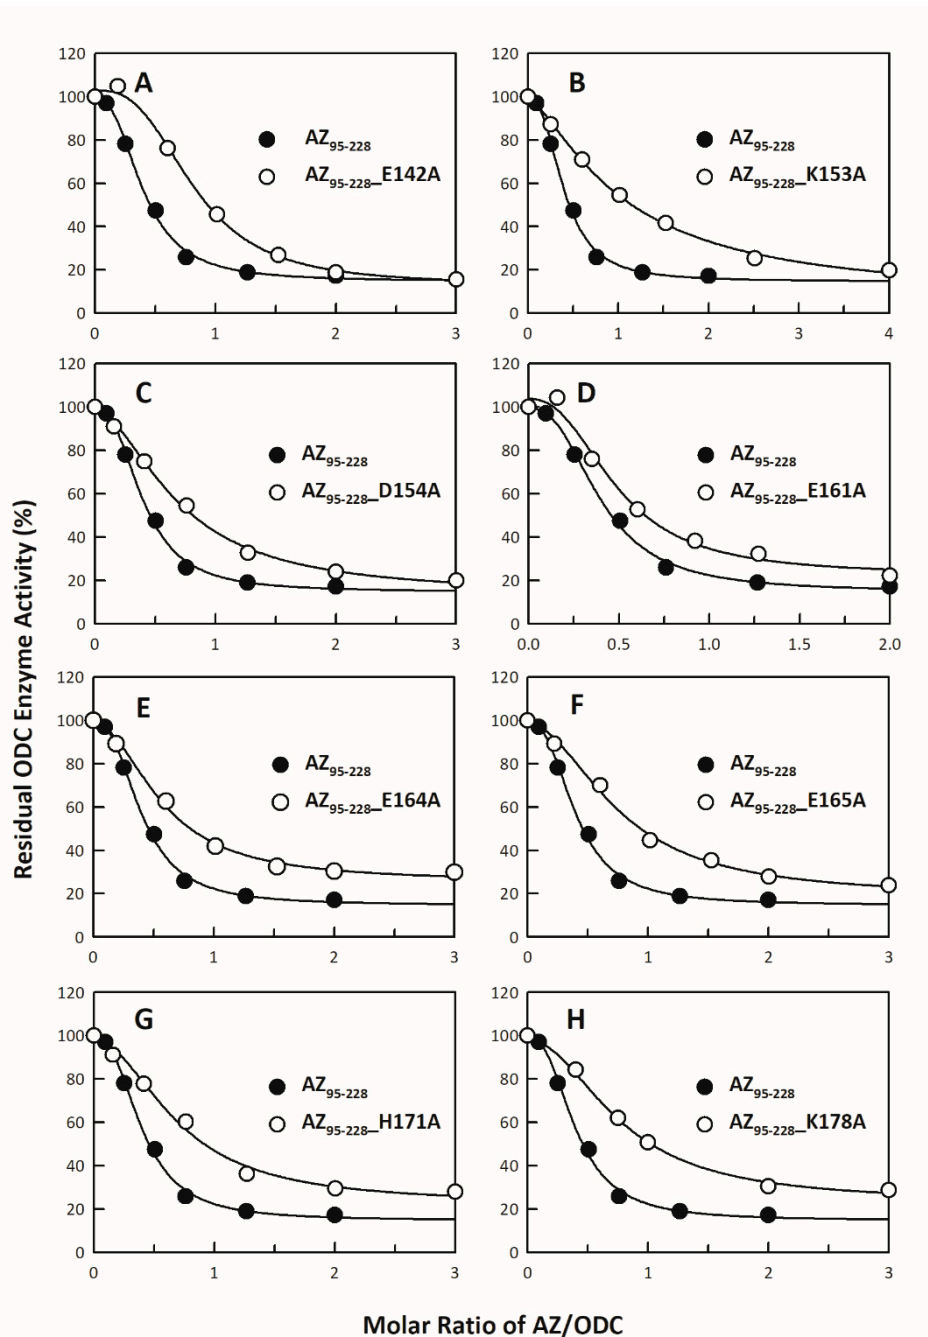

**Figure S2: Inhibition plots of the ODC enzyme with single mutants within the region after  $\beta 4$  strand of AZ<sub>95-228</sub>.**

The enzyme activity of ODC was inhibited by various single mutants of AZ<sub>95-228</sub>. The IC<sub>50</sub> values of single mutants of AZ<sub>95-228</sub> presented in Table 1 were derived by curve-fitting the inhibition plots. The molar ratio refers to AZ<sub>95-228</sub> versus the ODC monomer. (A) AZ<sub>95-228</sub>\_E142A, (B) AZ<sub>95-228</sub>\_K153A, (C) AZ<sub>95-228</sub>\_D154A, (D) AZ<sub>95-228</sub>\_E161A, (E) AZ<sub>95-228</sub>\_E164A, (F) AZ<sub>95-228</sub>\_D165A, (G) AZ<sub>95-228</sub>\_H171A, and (H) AZ<sub>95-228</sub>\_K178A.

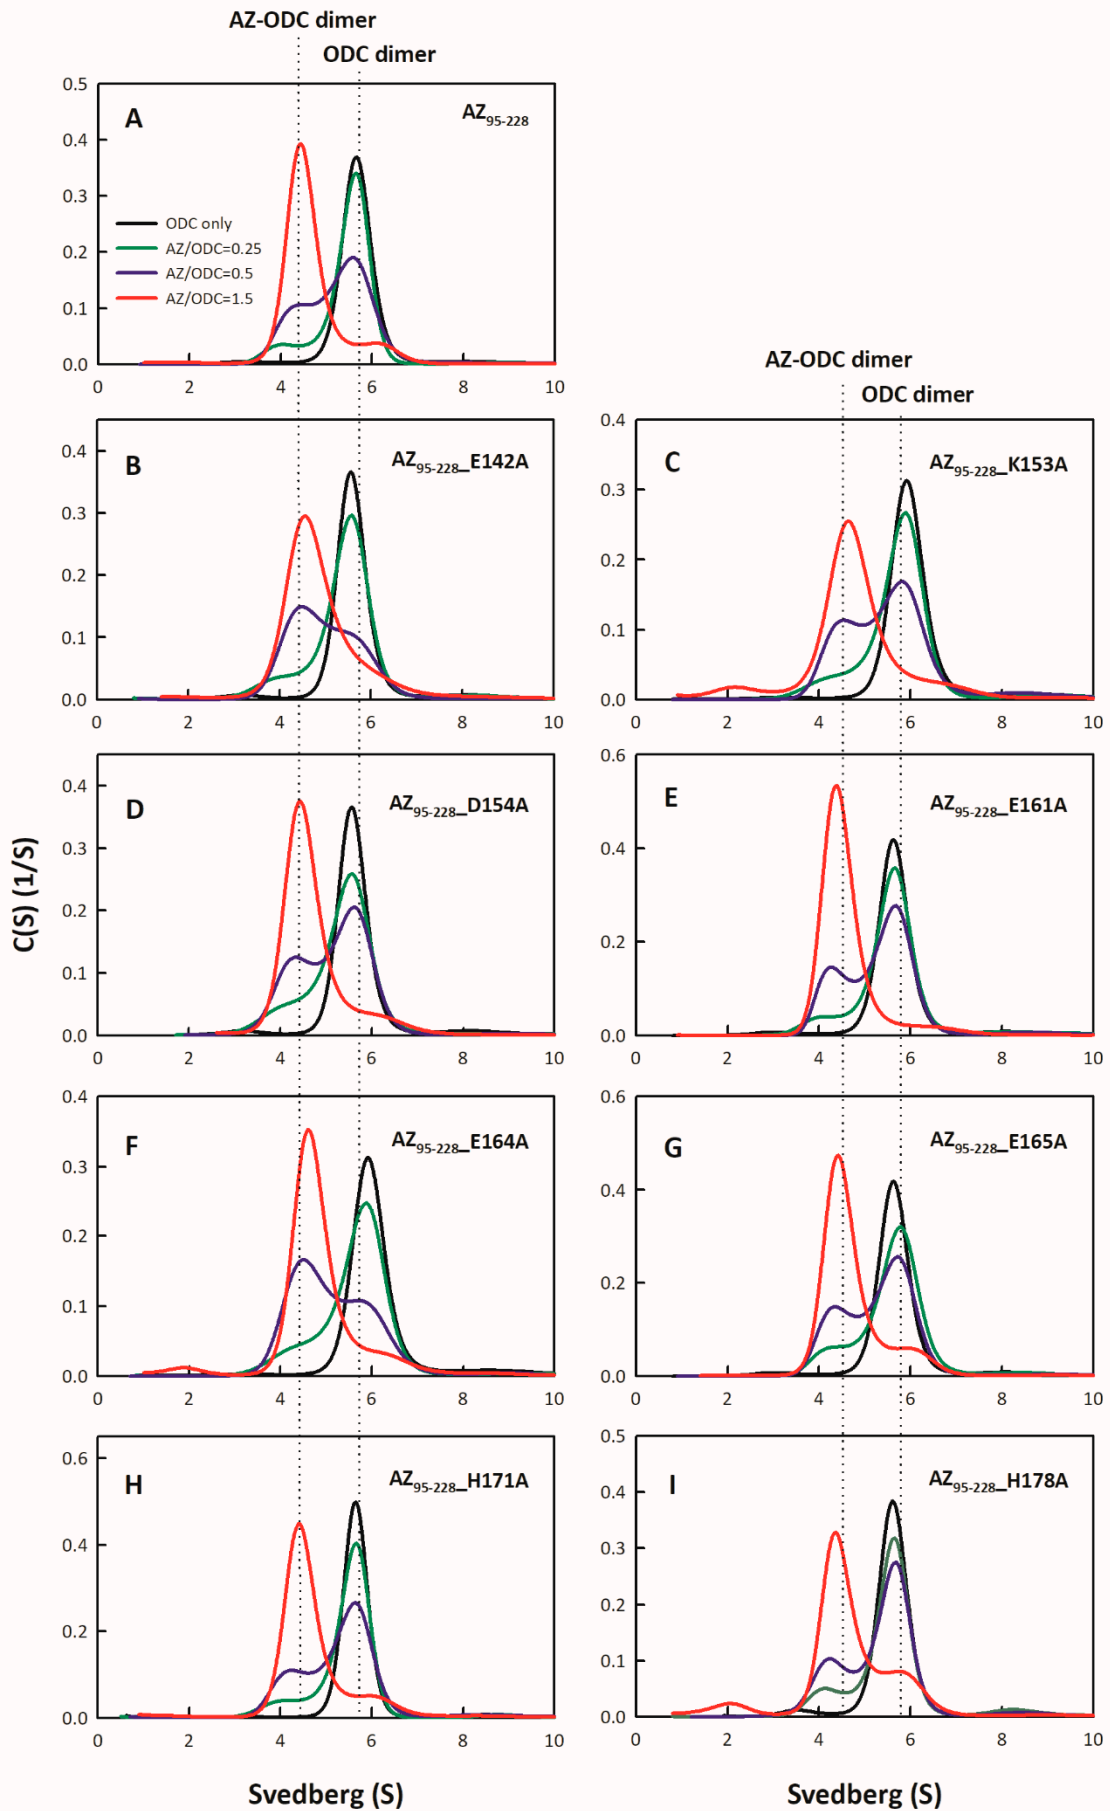

**Figure S3: Plots of continuous sedimentation coefficient distributions of the single mutants of  $AZ_{95-228}$ -ODC.**

(A)  $AZ_{95-228}$ -ODC, (B)  $AZ_{95-228\_E142A}$ -ODC, (C)  $AZ_{95-228\_K153A}$ -ODC, (D)  $AZ_{95-228\_D154A}$ -ODC, (E)  $AZ_{95-228\_E161A}$ -ODC, (F)  $AZ_{95-228\_E164A}$ -ODC, (G)  $AZ_{95-228\_D165A}$ -ODC, (H)  $AZ_{95-228\_H171A}$ -ODC, and (I)  $AZ_{95-228\_K178A}$ -ODC. The sedimentation velocity data for each figure were globally fitted with the SEDPHAT program to acquire  $K_d$  values for the  $AZ_{95-228}$ -ODC heterodimers shown in Table 2.

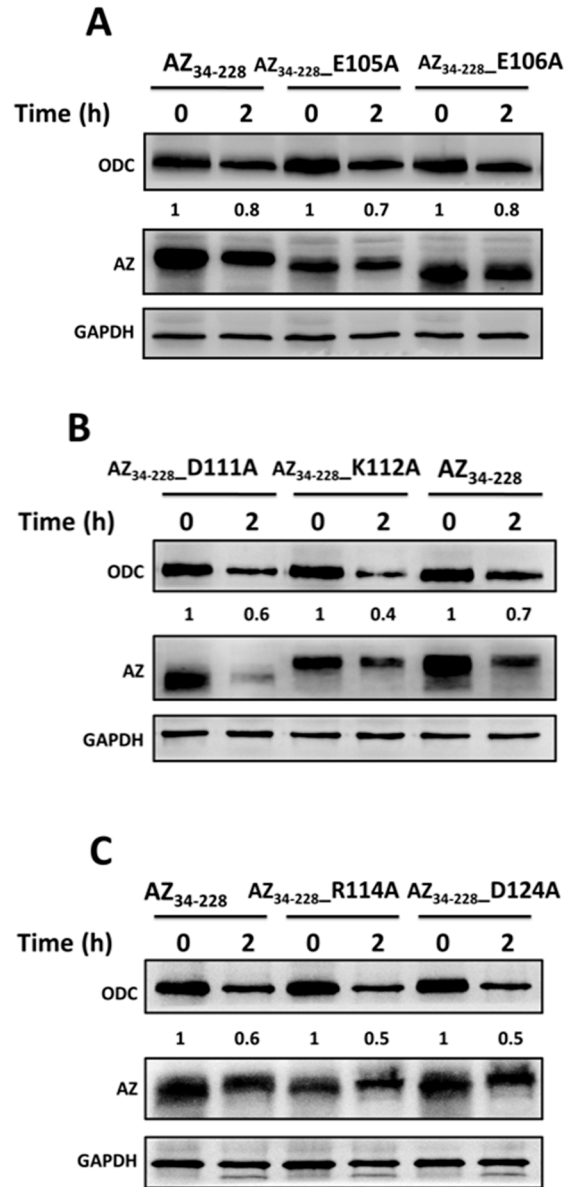

**Figure S4: AZ-mediated ODC in vitro degradation with AZ<sub>34-228</sub> mutant peptides in the rabbit reticulocyte lysate.**

ODC degradation by AZ mutants was detected by anti-ODC antibody (n=3). (A) ODC degradation with AZ<sub>34-228</sub>, AZ<sub>34-228</sub>\_E105A and AZ<sub>34-228</sub>\_E106A, (B) ODC degradation with AZ<sub>34-228</sub>, AZ<sub>34-228</sub>\_D111A and AZ<sub>34-228</sub>\_K112A, (C) ODC degradation with AZ<sub>34-228</sub>, AZ<sub>34-228</sub>\_R114A and AZ<sub>34-228</sub>\_D124A. A residual amount of ODC protein at a different time was indicated under the ODC blotting gel in each figure.

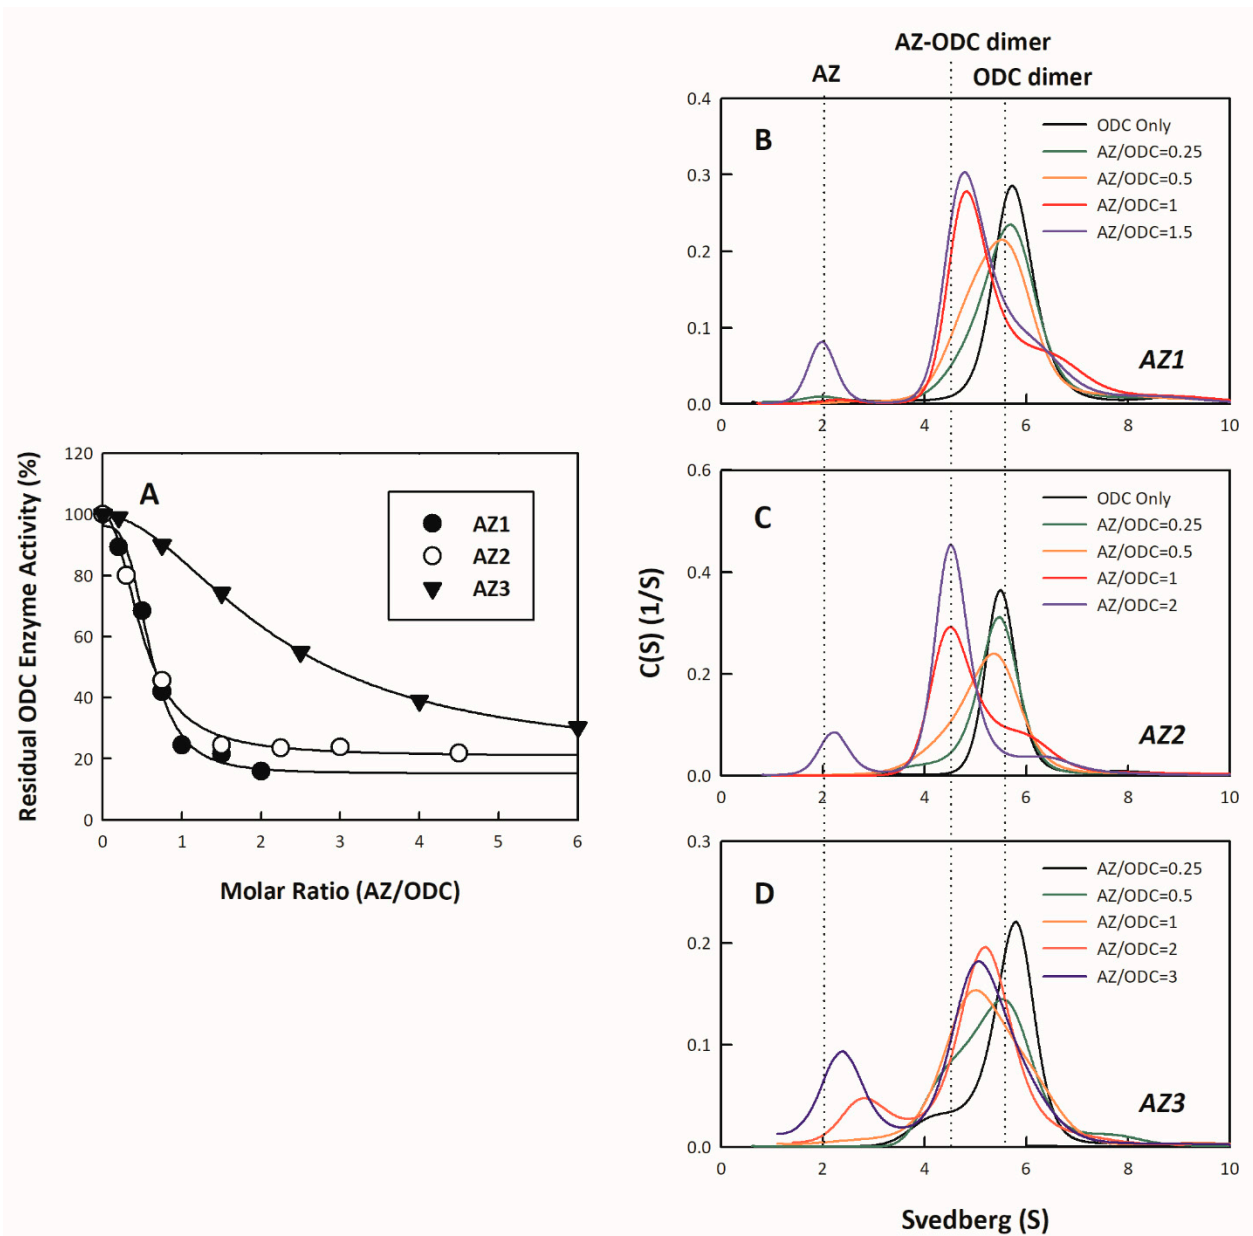

**Figure S5: Binding and inhibition of AZ isoforms toward ODC.**

(A) Inhibition plots of AZ1 (closed circles), AZ2 (open circles) and AZ3 (closed triangles). (B), (C) and (D) Size distribution plots of AZ1, AZ2 and AZ3, respectively. The  $IC_{50}$  values of AZ1, AZ2 and AZ3 were  $0.23 \mu\text{M}$ ,  $0.19 \mu\text{M}$  and  $0.84 \mu\text{M}$ , and the  $K_{d,AZ-ODC}$  values were  $0.22 \mu\text{M}$ ,  $0.28 \mu\text{M}$  and  $0.59 \mu\text{M}$ , respectively.

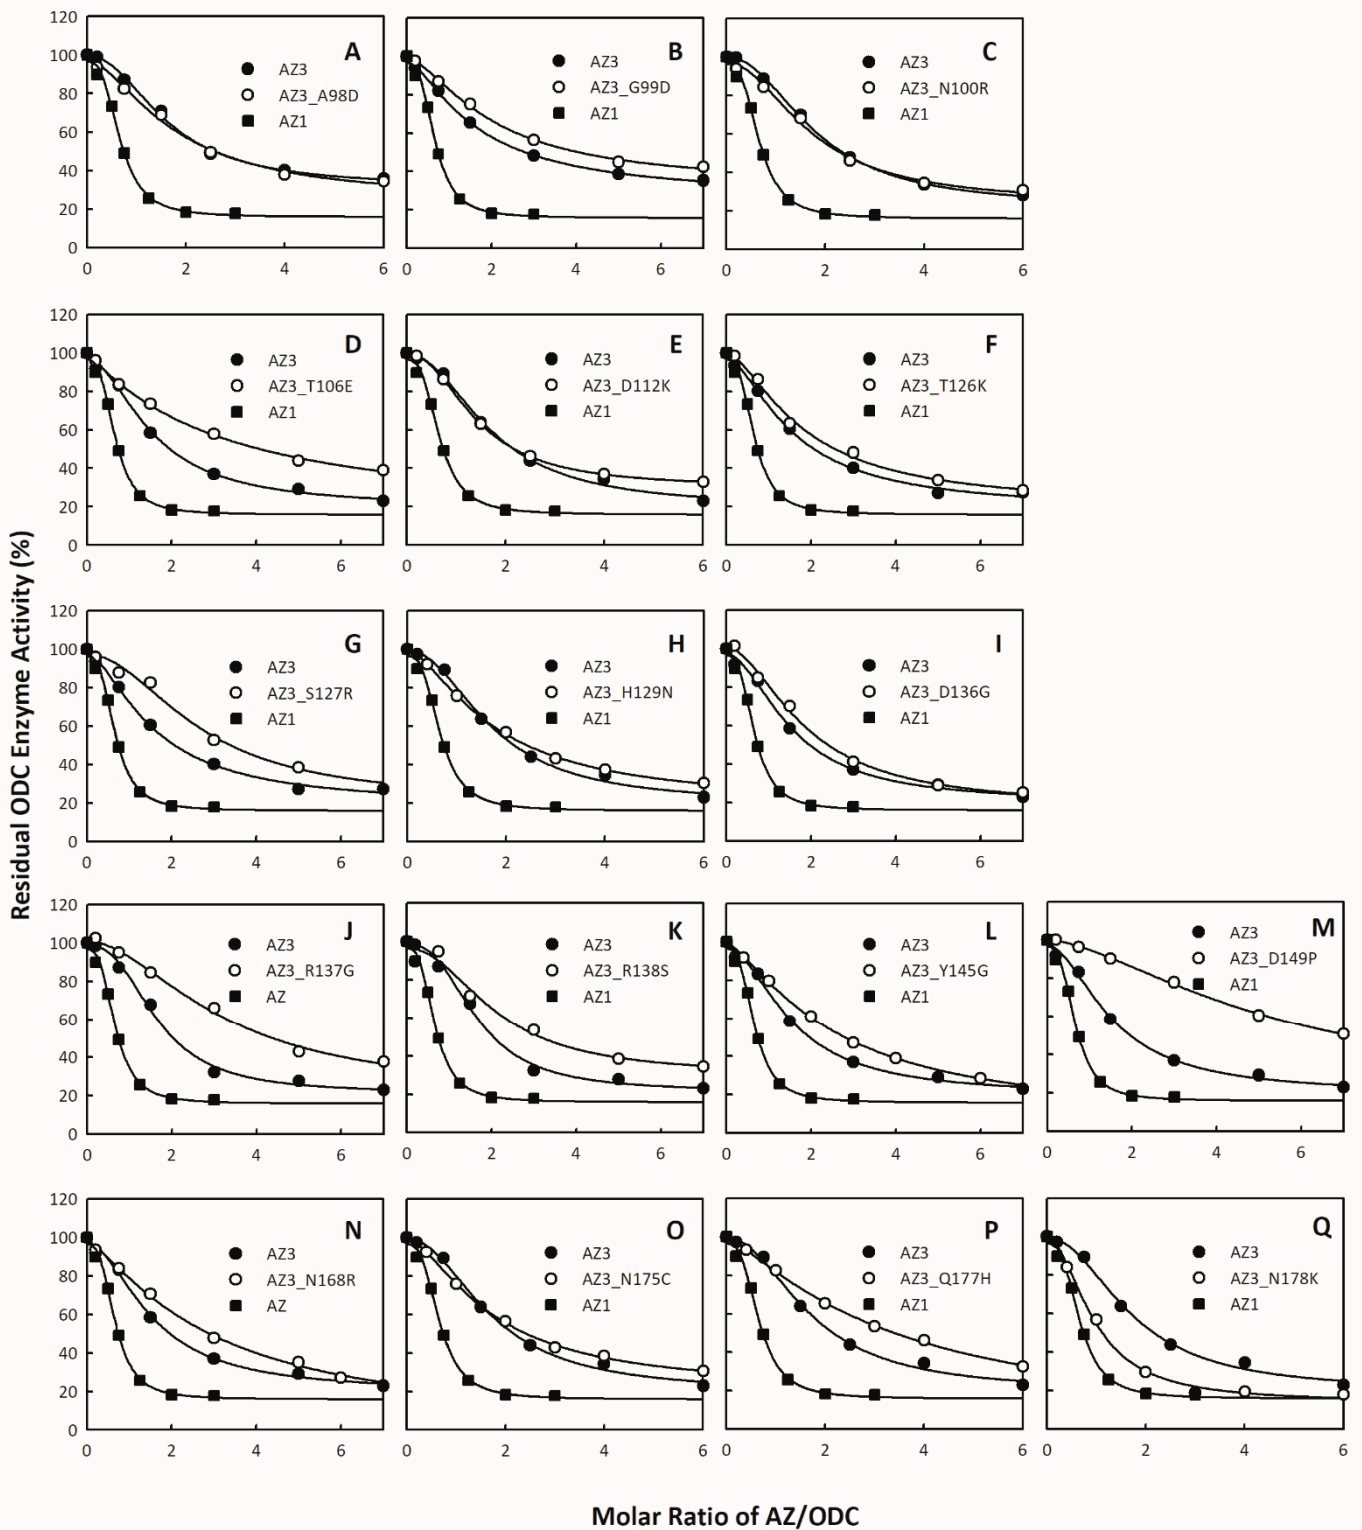

**Figure S6: Inhibition plots of the ODC enzyme with single mutants of AZ3.**

The enzyme activity of ODC was inhibited by various single mutants of AZ3. The  $IC_{50}$  values of single mutants of AZ3 presented in Table 3 were derived by curve-fitting the inhibition plots. The molar ratio refers to AZ3 versus the ODC monomer. (A) AZ3\_A98D, (B) AZ3\_G99D, (C) AZ3\_N100R, (D) AZ3\_T106E, (E) AZ3\_D112K, (F) AZ3\_T126K, (G) AZ3\_S127R, (H) AZ3\_H129N, (I) AZ3\_D136G, (J) AZ3\_R137G, (K) AZ3\_R138S, (L) AZ3\_Y145G, (M) AZ3\_D149P, (N) AZ3\_N168R, (O) AZ3\_N175C, (P) AZ3\_Q177H, and (Q) AZ3\_N178K.

**Table S1: IC<sub>50</sub> values for AZ<sub>95-228</sub> and its mutants within the  $\beta$ 1- $\beta$ 3 region and their connecting loops.**

| AZ Variants                | Location                             | <sup>1</sup> IC <sub>50</sub> ( $\mu$ M) | <sup>2</sup> Fold Change (IC <sub>50,mutant</sub> /IC <sub>50,WT</sub> ) |
|----------------------------|--------------------------------------|------------------------------------------|--------------------------------------------------------------------------|
| AZ <sub>95-228</sub>       | C-terminal domain                    | 0.16 $\pm$ 0.01                          | 1                                                                        |
| AZ <sub>95-228_D98A</sub>  | $\beta$ 1                            | 0.18 $\pm$ 0.02                          | 1.13                                                                     |
| AZ <sub>95-228_D99A</sub>  | $\beta$ 1                            | 0.17 $\pm$ 0.02                          | 1.06                                                                     |
| AZ <sub>95-228_R100A</sub> | $\beta$ 1                            | 0.19 $\pm$ 0.01                          | 1.19                                                                     |
| AZ <sub>95-228_E105A</sub> | $\beta$ 2                            | 0.19 $\pm$ 0.08                          | 1.19                                                                     |
| AZ <sub>95-228_E106A</sub> | $\beta$ 2                            | 0.20 $\pm$ 0.06                          | 1.3                                                                      |
| AZ <sub>95-228_D111A</sub> | Loop between $\beta$ 2 and $\beta$ 3 | 0.19 $\pm$ 0.02                          | 1.19                                                                     |
| AZ <sub>95-228_R114A</sub> | $\beta$ 3                            | 0.16 $\pm$ 0.02                          | 1                                                                        |
| AZ <sub>95-228_R121A</sub> | Loop between $\beta$ 3 and $\beta$ 4 | 0.16 $\pm$ 0.06                          | 1                                                                        |
| AZ <sub>95-228_D124A</sub> | Loop between $\beta$ 3 and $\beta$ 4 | 0.17 $\pm$ 0.02                          | 1.06                                                                     |

<sup>1</sup>The IC<sub>50</sub> values were derived from fitting the inhibition curves of ODC shown in Figure S1.

<sup>2</sup>Fold change was the ratio of the IC<sub>50</sub> of the mutant versus IC<sub>50</sub> of WT.



**Table S2: Mutagenic primers for the site-directed mutagenesis of AZ protein**

| <b>AZ1 Variants</b> | <b>Forward Primers</b>                                        |
|---------------------|---------------------------------------------------------------|
| AZ1_D98A            | 5'-CAGCTAACTTATTCTACTCC <b>GCG</b> GATCGGCTGAATGTAACAG-3'     |
| AZ1_D99A            | 5'-GCTAACTTATTCTACTCCGAT <b>GCG</b> CGGCTGAATGTAACAGAGG-3'    |
| AZ1_R100A           | 5'-CTAACTTATTCTACTCCGATGAT <b>GCG</b> CTGAATGTAACAGAGGAAC-3'  |
| AZ1_E105A           | 5'-GATCGGCTGAATGTAACAG <b>GCG</b> GAACTAACGTCCAACGAC-3'       |
| AZ1_E106A           | 5'-GGCTGAATGTAACAGAG <b>GCG</b> CTAACGTCCAACGACAAG-3'         |
| AZ1_N110A           | 5'-GAGGAACTAACGTCC <b>GCG</b> GACAAGACGAGGATTC-3'             |
| AZ1_D111A           | 5'-GAACTAACGTCCAAC <b>GCG</b> AAGACGAGGATTCTC-3'              |
| AZ1_K112A           | 5'-CTAACGTCCAACGAC <b>GCG</b> ACGAGGATTCTCAACG-3'             |
| AZ1_R114A           | 5'-CTAACGTCCAACGACAAGAC <b>GCG</b> ATTCTCAACGTCCAGTCCAGG-3'   |
| AZ1_N117A           | 5'-CAAGACGAGGATTCTC <b>GCG</b> GTCCAGTCCAGGCTC-3'             |
| AZ1_S120A           | 5'-GATTCTCAACGTCCAG <b>GCG</b> AGGCTCACAGACGCC-3'             |
| AZ1_R121A           | 5'-AGGATTCTCAACGTCCAGTCC <b>GCG</b> CTCACAGACGCCAAACGCATT-3'  |
| AZ1_D124A           | 5'-GCCTCTACATC <b>GCG</b> ATCCCGGGCGG-3'                      |
| AZ1_N129A           | 5'-CAGACGCCAAACGCATT <b>GCG</b> TGGCGAACAGTGCTG-3'            |
| AZ1_R131A           | 5'-CAAACGCATTAACCTGG <b>GCG</b> ACAGTGCTGAGTGGC-3'            |
| AZ1_G136A           | 5'-GCGAACAGTGCTGAGT <b>GCG</b> GGCAGCCTCTACATCG-3'            |
| AZ1_G137A           | 5'-GAACAGTGCTGAGTGG <b>GCG</b> AGCCTCTACATCGAGATC-3'          |
| AZ1_E142A           | 5'-GCCTCTACATC <b>GCG</b> ATCCCGGGCGG-3'                      |
| AZ1_G145A           | 5'-CTACATCGAGATCCCG <b>GCG</b> GGCGCGCTGCCCGAG-3'             |
| AZ1_K153A           | 5'-GCCCGAGGGGAGC <b>GCG</b> GACAGCTTTGCAG-3'                  |
| AZ1_D154A           | 5'-GAGGGGAGCAAG <b>GCG</b> AGCTTTGCAGTTC-3'                   |
| AZ1_E161A           | 5'-GCAGTTCTCCTG <b>GCG</b> TTTCGCTGAGGAG-3'                   |
| AZ1_E164A           | 5'-CTGGAGTTCGCT <b>GCG</b> GAGCAGCTGCG-3'                     |
| AZ1_E165A           | 5'-GAGTTCGCTGAG <b>GCG</b> CAGCTGCGAGC-3'                     |
| AZ1_H171A           | 5'-CAGCTGCGAGCCGAC <b>GCG</b> GTCTTCATTTGCTTC-3'              |
| AZ1_K178A           | 5'-CTTCATTTGCTTCCAC <b>GCG</b> AACCGCGAGGACA-3'               |
| AZ3_A98D            | 5'-CTTAAAGAACTGTATTCCG <b>GAC</b> GGGAACTTGACGGTG-3'          |
| AZ3_G99D            | 5'-CTTAAAGAACTGTATTCCGGCT <b>GAC</b> AACTTGACGGTGCTGGCTACT-3' |
| AZ3_N100R           | 5'-AAAGAACTGTATTCCGGCTGGG <b>CGT</b> TTGACGGTGCTGGCTACTGAC-3' |
| AZ3_T106E           | 5'-GACGGTGCTGGCT <b>GAA</b> GACCCCTGCTCCAC-3'                 |
| AZ3_D112K           | 5'-CTGACCCCTGCTCCACCAG <b>AAA</b> CCAGTACAGTTAGACTTTCAC-3'    |
| AZ3_S124D           | 5'-CTTTCACCTTCCGCCTTACCG <b>GAC</b> CAGACCTCTGCCATTGGC-3'     |
| AZ3_T126K           | 5'-CTTCCGCCTTACCTCCAG <b>AAA</b> TCTGCCATTGGCACGGCCTTTC-3'    |
| AZ3_S127R           | 5'-CGCCTTACCTCCAGACC <b>CGT</b> GCCCATTGGCACGGCCTTTC-3'       |
| AZ3_H129N           | 5'-CTCCAGACCTCTGCC <b>AACT</b> GGCACGGCCTTTC-3'               |
| AZ3_D136G           | 5'-ATTGGCACGGCCTTCTCTGT <b>GGT</b> CGTCGACTCTTCTGGATAT-3'     |
| AZ3_R137G           | 5'-GCACGGCCTTCTCTGTGAC <b>GGT</b> CGACTCTTCTGGATATCCC-3'      |
| AZ3_R138S           | 5'-CACGGCCTTCTCTGTGACCGT <b>TCT</b> CTTCTTCTGGATATCCCATATC-3' |

|                  |                                                            |
|------------------|------------------------------------------------------------|
| <b>AZ3_Y145G</b> | 5'-GTTTGTGGAGATCCCG <u>GGT</u> GGTCTGCTGGCCGAT-3'          |
| <b>AZ3_D149P</b> | 5'-GATATCCCATATCAGGCCTTG <u>CCG</u> CAAGGCAACCGGAAAGTTG-3' |
| <b>AZ3_Q150E</b> | 5'-CCCATATCAGGCCTTGAT <u>GAA</u> GGCAACCGGAAAGTTTGAC-3'    |
| <b>AZ3_K166Q</b> | 5'-CCTGGAGTACGTGGAAGAG <u>CAG</u> ACAAATGTGGACTCTGTGT-3'   |
| <b>AZ3_N168R</b> | 5'-GTACGTGGAAGAGAAGACA <u>CGT</u> GTGGACTCTGTGTTTGTGAAC-3' |
| <b>AZ3_S171H</b> | 5'-GAGAAGACAAATGTGGAC <u>CAC</u> GTGTTTGTGAACTTCCAG-3'     |
| <b>AZ3_N175C</b> | 5'-GTGGACTCTGTGTTTGTG <u>TGC</u> TCCAGAATGATCGG-3'         |
| <b>AZ3_Q177H</b> | 5'-GTGTTTGTGAACTT <u>CAC</u> CAATGATCGGAACGACAG-3'         |
| <b>AZ3_N178K</b> | 5'-GTTTGTGAACTTCCAG <u>AAA</u> GATCGGAACGACAGAGG-3'        |
| <b>AZ3_D179N</b> | 5'-GTTTGTGAACTTCCAGAAT <u>AAC</u> CGGAACGACAGAGGTGCCCT-3'  |
